# Supplementary material for: Development of a novel selection/counter-selection system for chromosomal gene integrations and deletions in lactic acid bacteria
Source: PubMed Central journal article supplement (PMC6440147; doi:10.1186/s12867-019-0127-x), 2019-03-29
Supplement: 12867_2019_127_MOESM1_ESM.pdf [file 12867_2019_127_MOESM1_ESM.pdf]

## *Additional file 1*

# **Development of a Novel Selection/Counter-selection System for Chromosomal Gene Integrations and Deletions in Lactic Acid Bacteria**

Winschau F. Van Zyl, Leon M. T. Dicks<sup>#</sup>, Shelly M. Deane

**#Correspondence:** Leon M. T. Dicks: [lmtd@sun.ac.za](mailto:lmtd@sun.ac.za)

### **Additional file 1: Text S1**

#### **Construction of integration vectors**

The *L. plantarum* 423 *plaA* bacteriocin gene knockout (KO) plasmid was constructed by PCR, amplifying the complete 2012 bp region of homology that included the *plaA* open reading frame (ORF), using primers plaAKO1 and plaAKO2 (Supplementary Figure S6). The generated amplicon was triple digested with EcoRI, HpaI and XbaI, resulting in the removal of 108 bp from the *plaA* ORF, ligated to a blunt-ended *erm-ffluc* gene cassette and pBluescriptKS digested with EcoRI and XbaI, yielding plasmid pKSplaA::ErmFfluc. The 3204 bp *erm-ffluc* gene cassette contained the *erm* gene for erythromycin resistance, the firefly luciferase gene (*ffluc*) from *Photinus pyralis* fused to the strong constitutive *L. plantarum* *ldh* gene (*Pldh*) promoter, generated via PCR using primer pair erm1/fluc2 and plasmid pNZErmFfluc423 (Supplementary Table S1) as source DNA. The pKSplaA::ErmFfluc construct was used as template for PCR amplification of a 5013 bp amplicon containing the *plaA* upstream, *plaA* downstream and *erm-ffluc* gene cassette using primer pair plaAKO1/plaAKO2. Next, the full-length blunt-ended 5013 bp PCR fragment

was cloned into the destination plasmid pNZmazFnisRK, before digestion of the plasmid with BglIII and filling in the 5' sticky ends, yielding plasmid pNZKOplaA::ErmFfluc.

The pNZKOsrnC::FRTerm plasmid, designed for disruption of the *E. mundtii* ST4SA *sortase C* (*srtC*) gene was constructed as follows. Two regions of homology (~1 kb upstream and ~0.4 kb downstream) flanking the *srtC* gene were PCR amplified using primer pairs srtCKO1for/srtCKO1rev and srtCKO2for/srtCKO2rev, respectively (Supplementary Figure S7). The generated fragments were digested with HindIII/HpaI and HpaI/XbaI, ligated to the blunt-ended FRT-*erm* gene and cloned to the HindIII/XbaI double-digested pBluescriptKS plasmid, yielding plasmid pKSsrnC::FRTerm. Finally, the complete FRT-*erm* –*srtC* and flanking region was amplified from pKSsrnC::FRTerm using primer pair srtCKO1for/srtCKO2rev and cloned into the HindIII-linearized and blunt-ended plasmid pNZmazFnisRK, to yield plasmid pNZKOsrnC::FRTerm.

### ***mCherry* reporter gene expression in LAB using the nisin-inducible promoter**

To demonstrate the utility of the nisin-induction system using a reporter gene, *Lc. lactis* pNZ9000 transformed with plasmid pNZCherry, *L. plantarum* 423 and *E. mundtii* ST4SA each transformed with plasmid pNZCherrynisRK were grown in MRS or M17 broth for 12 h (Supplementary Table S1). Each 12-h old culture was then serially diluted and plated onto MRS or M17 agar plates supplemented with or without nisin. Expression of the *mCherry* reporter gene was confirmed visually by a colony color change from white to pink or purple. Strains harboring the empty pNZ8048 vector were used as controls.

### **Detection of *in vitro* bioluminescence**

*Lactobacillus plantarum* 423 and *E. mundtii* ST4SA recombinant strains carrying the *ffluc* bioluminescence gene were analyzed on agar plates for bioluminescence emission using the

Caliper *in vivo* imaging system (IVIS; Caliper Life Sciences, Hopkinton, MA, USA). Cultures were grown for 12 h in MRS broth, plated onto MRS agar plates using sterile swabs and incubated at 30°C for 24 h. Prior to imaging, one ml of beetle D-luciferin potassium salt substrate (Anatech Instruments, Bellville, South Africa) at 150 µg/ml dissolved in phosphate-buffered saline (PBS) was added directly to the colonies.

**Additional file 1: Table S1: Bacterial strains and plasmids used in this study**

| Strain or plasmid              | Description                                                                                                                                                                                                                                                                          | Reference or source                          |
|--------------------------------|--------------------------------------------------------------------------------------------------------------------------------------------------------------------------------------------------------------------------------------------------------------------------------------|----------------------------------------------|
| <b>Strains</b>                 |                                                                                                                                                                                                                                                                                      |                                              |
| <i>Lactobacillus plantarum</i> |                                                                                                                                                                                                                                                                                      |                                              |
| 423 pNZ8048                    | Contains the pNZ8048 plasmid; Cm <sup>R</sup>                                                                                                                                                                                                                                        | This study                                   |
| 423 pNZCherryinisRK            | Contains the pNZCherryinisRK plasmid; Cm <sup>R</sup>                                                                                                                                                                                                                                | This study                                   |
| 423 bac <sup>-</sup>           | Derivative of <i>L. plantarum</i> 423, cured of the plasmid (pPLA4) harboring the <i>plaA</i> bacteriocin gene                                                                                                                                                                       | [44]                                         |
| <i>Enterococcus mundtii</i>    |                                                                                                                                                                                                                                                                                      |                                              |
| ST4SA pNZ8048                  | Contains the pNZ8048 plasmid; Cm <sup>R</sup>                                                                                                                                                                                                                                        | This study                                   |
| ST4SA pNZCherryinisRK          | Contains the pNZCherryinisRK plasmid; Cm <sup>R</sup>                                                                                                                                                                                                                                | This study                                   |
| <i>Lactococcus lactis</i>      |                                                                                                                                                                                                                                                                                      |                                              |
| pNZ9000 pNZCherry              | Contains the pNZCherry plasmid; Cm <sup>R</sup>                                                                                                                                                                                                                                      | This study                                   |
| <i>Listeria monocytogenes</i>  |                                                                                                                                                                                                                                                                                      |                                              |
| EGDe                           | Food-borne clinical pathogen; harbors the pPL2 lux plasmid; Cm <sup>R</sup>                                                                                                                                                                                                          | Caliper Life Sciences, Hopkinton, MA, U.S.A. |
| <b>Plasmids</b>                |                                                                                                                                                                                                                                                                                      |                                              |
| pNZErmFluc423                  | pNZ8048 vector carrying the <i>erm</i> gene fused to the <i>Photinus pyralis</i> firefly luciferase gene ( <i>ffluc</i> ) under the control of the constitutive <i>L. plantarum</i> 423 lactate dehydrogenase ( <i>ldh</i> ) gene promoter (Pldh); Em <sup>R</sup> , Cm <sup>R</sup> | This study                                   |
| pGKVCatFflucST4SA              | pGKV223D vector carrying the <i>cat</i> gene fused to the <i>ffluc</i> gene under the control of the constitutive <i>E. mundtii</i> ST4SA lactate dehydrogenase ( <i>ldh</i> ) gene promoter (Pstldh); Em <sup>R</sup> , Cm <sup>R</sup>                                             | This study                                   |
| pKSplaA::ErmFfluc              | pBluescriptKS plasmid carrying the <i>erm-ffluc</i> gene cassette flanked by <i>L. plantarum</i> 423 <i>plaA</i> gene regions of homology ; Em <sup>R</sup> , Amp <sup>R</sup>                                                                                                       | This study                                   |
| pKSmunA::CatFfluc              | pBluescriptKS plasmid carrying the <i>cat-ffluc</i> gene cassette flanked by <i>E. mundtii</i> ST4SA <i>munA</i> gene regions of homology; Cm <sup>R</sup> , Amp <sup>R</sup>                                                                                                        | This study                                   |
| pKsaap::FRTerm                 | pBluescriptKS plasmid carrying the FRT-flanked <i>erm</i> gene flanked by <i>L. plantarum</i> 423 <i>aap</i> gene regions of homology ; Em <sup>R</sup> , Amp <sup>R</sup>                                                                                                           | This study                                   |

|                 |                                                                                                                                                                             |            |
|-----------------|-----------------------------------------------------------------------------------------------------------------------------------------------------------------------------|------------|
| pKSsrtA::FRTerm | pBluescriptKS plasmid carrying the FRT-flanked <i>erm</i> gene flanked by <i>E. mundtii</i> ST4SA <i>srtA</i> gene regions of homology ; Em <sup>R</sup> , Amp <sup>R</sup> | This study |
| pKSsrtC::FRTerm | pBluescriptKS plasmid carrying the FRT-flanked <i>erm</i> gene flanked by <i>E. mundtii</i> ST4SA <i>srtC</i> gene regions of homology; Em <sup>R</sup> , Amp <sup>R</sup>  | This study |
| pNZCherry       | pNZ8048 vector carrying the <i>mCherry</i> fluorescence gene under the control of the PnisA promoter; Cm <sup>R</sup>                                                       | This study |
| pNZCherryisRK   | pNZnisRK vector carrying <i>mCherry</i> fluorescence gene under the control of the PnisA promoter; Cm <sup>R</sup>                                                          | This study |

Cm<sup>R</sup>, chloramphenicol resistance; Em<sup>R</sup>, erythromycin resistance; Amp<sup>R</sup>, ampicillin resistance

## References

Van Reenen, C.A., Van Zyl, W.H. & Dicks, L.M.T. (2006) Expression of the immunity protein of plantaricin 423, produced by *Lactobacillus plantarum* 423, and analysis of the plasmid encoding the bacteriocin. *Appl. Environ. Microbiol.* 72, 7644–7651.

**Additional file 1: Table S2: Oligonucleotides utilized in this study**

| Target                                   | Primer     | Sequence (5' to 3') <sup>†</sup>              | Restriction sites | Product size (bp) |
|------------------------------------------|------------|-----------------------------------------------|-------------------|-------------------|
| <i>nisR-nisK</i>                         | nisRK1     | GCGC <u>AAGCTT</u> CCCCGGCTTTAGGTATAG         | HindIII           | 2162              |
|                                          | nisRK2     | ATCC <u>CTCGAG</u> TTACTTTTTTATTTTTAGGATA     | XhoI              |                   |
| <i>mazF</i>                              | mazF1      | GCTTGGAT <u>CCATGG</u> TAAGCCGATACGTACC       | NcoI              | 342               |
|                                          | mazF2      | AGTC <u>AAGCTT</u> CTACCCAATCAGTACGTTAAT<br>T | HindIII           |                   |
| <i>erm-ffluc</i><br>gene<br>cassette     | erm1       | ATAC <u>GAATTC</u> CACGACCAAACTATAAAACC       | EcoRI             | 3204              |
|                                          | fluc2      | GCGC <u>AAGCTT</u> CACAATTTGACTTGCCA          | HindIII           |                   |
| <i>plaA</i> KO<br>region                 | plaAKO1    | <u>GAATTC</u> GTGATATATAATGATGGAATTTATTC      | EcoRI             | 2012              |
|                                          | plaAKO2    | <u>TCTAGAG</u> CCCTTAGCGTACTTATCCCAGGC        | XbaI              |                   |
| <i>munA</i> KO<br>region                 | munAKO1    | GCCG <u>GAATTC</u> GTTTATACGATTAGTGGAATT<br>A | EcoRI             | 1809              |
|                                          | munAKO2    | ATACT <u>TCTAGAG</u> AACAATATCTCCAGTTTT       | XbaI              |                   |
| <i>cat-ffluc</i><br>gene<br>cassette     | cat1       | <u>GGAATTC</u> GGATCCATTCTAATGAAG             | EcoRI             | 2349              |
|                                          | fluc2      | GCGC <u>AAGCTT</u> CACAATTTGACTTGCCA          | HindIII           |                   |
| <i>aap</i> KI<br>region                  | aapKO1     | GCCG <u>GAATTC</u> GAGTACTGTGACGACAGCTA       | EcoRI             | 1848              |
|                                          | aapKO2     | ATACT <u>TCTAGAG</u> TAATCGTCCGGTAACCGTT      | XbaI              |                   |
| FRT- <i>erm</i><br>gene                  | M13for     | GTAAAACGACGGCCAG                              | blunt             | 1458              |
|                                          | M13rev     | CAGGAAACAGCTATGA                              | blunt             |                   |
| <i>srtA</i><br>upstream<br>region        | srtAKO1for | CACC <u>AAGCTT</u> GTAGGTTACTTCATCAACGG       | HindIII           | 1011              |
|                                          | srtAKO1rev | GATAG <u>GTTAAC</u> TAGTAGAAACAATAGGAAAT      | HpaI              |                   |
| <i>srtA</i><br>down-<br>stream<br>region | srtAKO2for | TATAG <u>GTTAAC</u> AAAGAAGCCACCCAAGAAAT      | HpaI              | 376               |
|                                          | srtAKO2rev | GATAT <u>TCTAGAG</u> CCCGAAAAATTTACTGATGA     | XbaI              |                   |
| <i>srtC</i><br>upstream<br>region        | srtCKO1for | GAGG <u>AAGCTT</u> ATTAGATGGGCAAGACGTAG       | HindIII           | 1011              |
|                                          | srtCKO1rev | GATAG <u>GTTAAC</u> CCGATAAAAAATACCGAGAA      | HpaI              |                   |
| <i>srtC</i><br>down-<br>stream<br>region | srtCKO2for | CACC <u>GTTAAC</u> TTTTTGTTGCTATTTCTTAT       | HpaI              | 1035              |
|                                          | srtCKO2rev | CACCT <u>TCTAGAG</u> AGATTATAATTTGAATTTTA     | XbaI              |                   |

|                                           |                    |                                                |         |      |
|-------------------------------------------|--------------------|------------------------------------------------|---------|------|
| FRT target 1                              | FRTfor1            | AGAT <b><u>GGATCC</u></b> CTCGTTTTCGGAAACGCTTT | BamHI   | 121  |
|                                           | FRTrev1            | GATA <b><u>CTGCAG</u></b> TTCAGAGCGCTTTTGGTTTT | PstI    |      |
| FRT target 2                              | FRTfor2            | AGAT <b><u>AAGCTT</u></b> CTCGTTTTCGGAAACGCTTT | HindIII | 121  |
|                                           | FRTrev2            | GATA <b><u>GTCGAC</u></b> TTCAGAGCGCTTTTGGTTTT | Sall    |      |
| <i>erm</i> gene                           | <i>erm</i> 1       | ATAC <b><u>GAATTC</u></b> CACGACCAAACTATAAAACC | EcoRI   | 1063 |
|                                           | <i>erm</i> 2       | GCTT <b><u>GAATTC</u></b> TACTTATTAATAATTTATAG |         |      |
| FLP gene                                  | FLPfor             | GATA <b><u>CCATGG</u></b> ATGCCACAATTTGGTATATT | NcoI    | 1293 |
|                                           | FLPprev            | AGTA <b><u>GTCGAC</u></b> TTATATGCGTCTATTTATGT | Sall    |      |
| asRNA repA                                | asRNAfor           | ATAT <b><u>CCATGG</u></b> TTCATATGAACCTTTGAT   | NcoI    | 350  |
|                                           | asRNArev           | CACG <b><u>AAGCTT</u></b> GATAAGGTAATTATATCAT  |         |      |
| Pldh-FLP amplicon                         | Pldh1              | <b><u>GAATTC</u></b> AATCTTCTCACCGTCT          | EcoRI   | 1794 |
|                                           | FLPprev            | AGTA <b><u>GTCGAC</u></b> TTATATGCGTCTATTTATGT | Sall    |      |
| <i>plaA</i> KO integration region         | <i>plaA</i> KOc    | AATATCTTCGTTGCTGTGAT                           | -       | 5118 |
|                                           | <i>plaA</i> KO2    | <b><u>TCTAGA</u></b> GCCTTAGCGTACTTATCCCAGGC   | XbaI    |      |
| <i>munA</i> KO integration region         | <i>munA</i> KOc    | ATTCTTGAGAACATTCCACA                           | -       | 4190 |
|                                           | <i>munA</i> KO2    | ATACT <b><u>TCTAGA</u></b> GACAATATCTCCAGTTTT  | XbaI    |      |
| <i>aap</i> KI integration region          | <i>aap</i> KOc     | GGCGCCAGCAGCCAACTCAA                           | -       | 3696 |
|                                           | <i>aap</i> KOc2    | CGTAGCCCTCATGGCTCAGA                           | -       |      |
| <i>aap</i> KI unmarked integration region | <i>aap</i> KOc     | GGCGCCAGCAGCCAACTCAA                           | -       | 2573 |
|                                           | <i>aap</i> KOc2    | CGTAGCCCTCATGGCTCAGA                           | -       |      |
| <i>srtA</i> KO integration region         | <i>srtA</i> KOc    | GATGGTTTTGTTTATTCGAA                           | -       | 3853 |
|                                           | <i>srtA</i> KO2rev | GATATCTAGAGCCGAAAAATTTACTGATGA                 | -       |      |
|                                           | <i>srtA</i> CKOc   | GAAGGAACGCTGAAGGTCAA                           | -       | 3183 |
| <i>srtC</i> KO integration region         | <i>srtC</i> KOc2   | AAACTAGTCCTGTCGTTTCCTT                         | -       |      |

†: Bold and underlined sequences indicate restriction sites; Full target gene names are listed in main text and Table 2; KO: knockout; KOc: knockout confirmation; for: forward; rev: reverse.

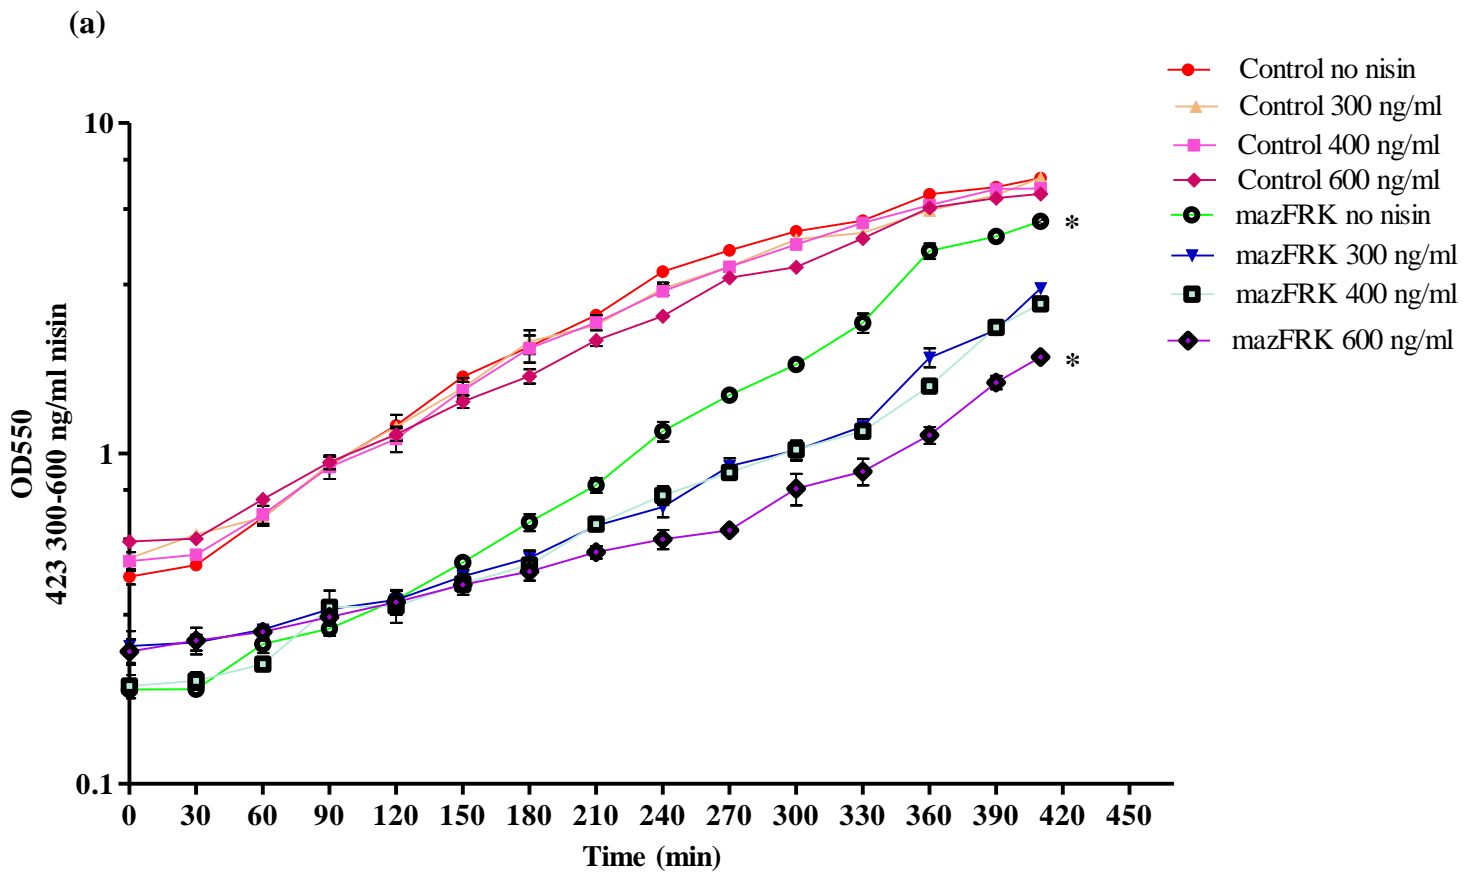

(b)

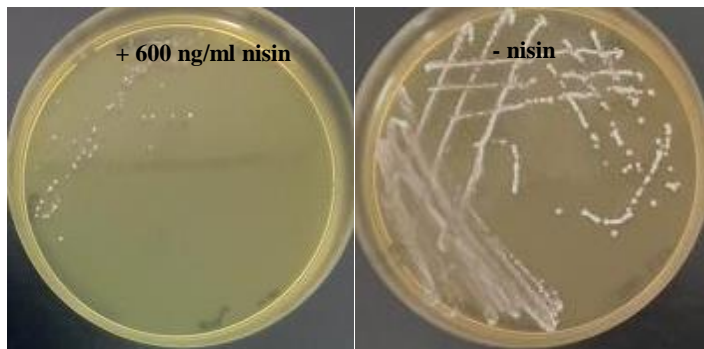

**Additional file 1: Fig. S1.** Optimization of nisin-controlled *mazF* gene expression in *L. plantarum* 423. (a) Growth comparison of *L. plantarum* 423 transformed with the empty pNZ8048 vector (control) and *L. plantarum* 423 transformed with the PnisA controlled *mazF* gene pNZmazFnisRK plasmid in sub-inhibitory concentrations of nisin (0 - 600 ng/ml). Significant differences ( $P < 0.05$ ; Kruskal-Wallis nonparametric test) between mazFRK no nisin and mazFRK 600 ng/ml are



indicated with an asterisk. **(b)** MRS agar plates representative of the effect of MazF protein expression in *L. plantarum* 423 harboring the pNZmazFnisRK plasmid in the absence of nisin (-nisin) and in the presence of nisin (+600 ng/ml nisin).

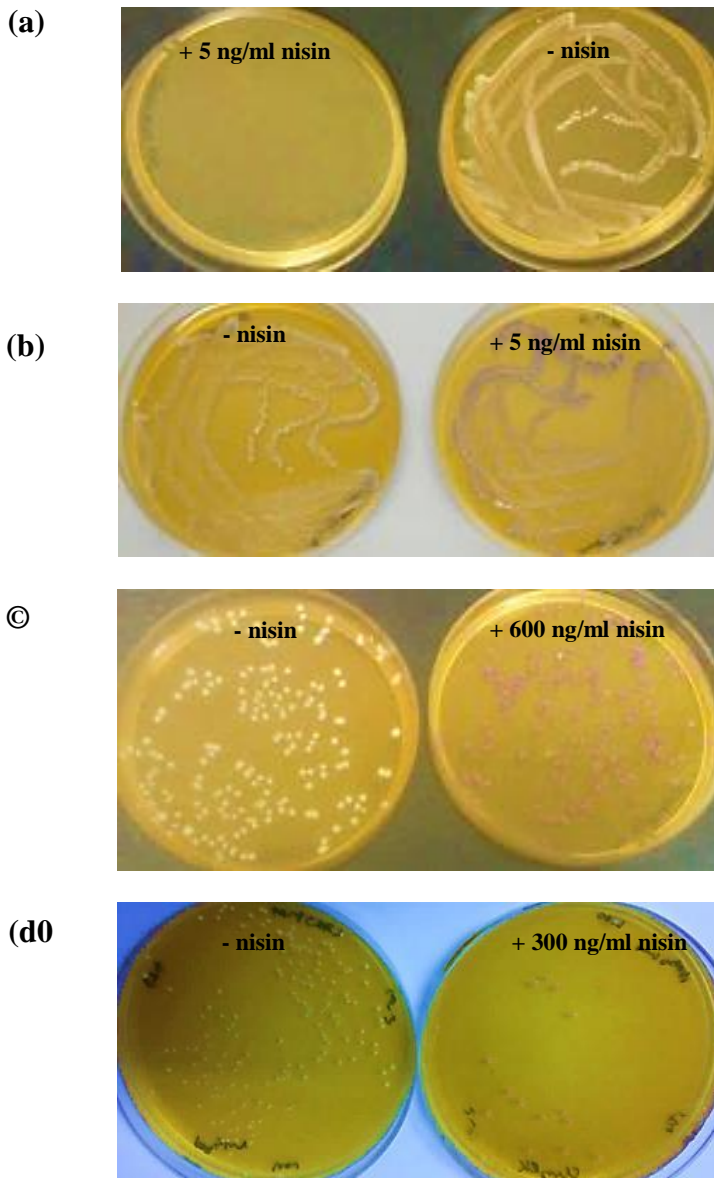

**Additional file 1: Fig. S2.** Plates showing the effect of PnisA promoter-controlled MazF protein expression in *Lc. lactis* pNZ9000 and PnisA promoter-controlled mCherry fluorescence protein expression in *Lc. lactis* pNZ9000, *L. plantarum* 423 and *E. mundtii* ST4SA. **(a)** M17 agar plates representative of the effect of MazF protein expression in *Lc. lactis* pNZ9000 harboring the pNZmazF plasmid in the absence of nisin (-nisin) and in the presence of nisin (+5 ng/ml nisin). **(b)** M17 agar plates showing the expression of the *mCherry* fluorescence gene in *Lc. lactis* pNZ9000 harboring the pNZCherry plasmid in the absence of nisin (-nisin) and in the presence of nisin (+5 ng/ml nisin). **(c)** MRS agar plates showing the expression of the *mCherry* fluorescence

gene in *L. plantarum* 423 harboring the pNZCherryNisRK plasmid in the absence of nisin (-nisin) and in the presence of nisin (+600 ng/ml nisin). **(d)** MRS agar plates showing the expression of the *mCherry* fluorescence gene in *E. mundtii* ST4SA harboring the pNZCherryNisRK plasmid in the absence of nisin (-nisin) and in the presence of nisin (+300 ng/ml nisin).



**Additional file 1: Fig. S3.** Schematic representing the construction of the pNZK $_{OmunA::Cat}$ Fluc integrative plasmid containing the *cat* gene and two flanking sequences of the *munA* bacteriocin gene from *E. mundtii* ST4SA. Relevant genes, restriction sites and PCR primers are shown. Construction of the plasmid is best understood by referring to “Materials and Methods” in the main text.

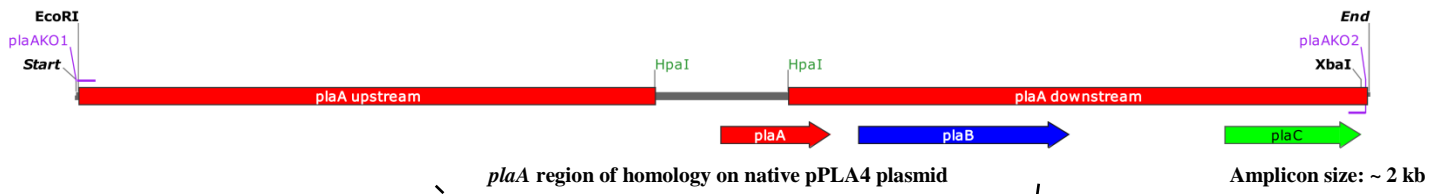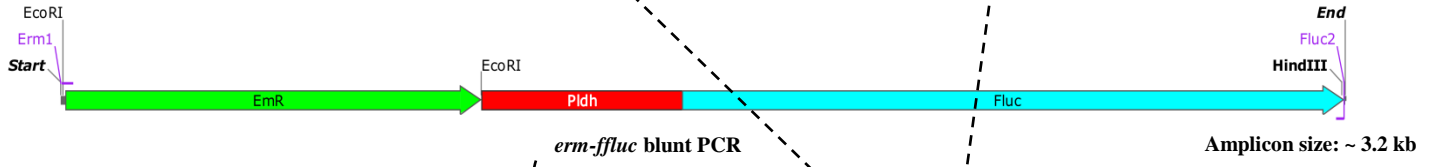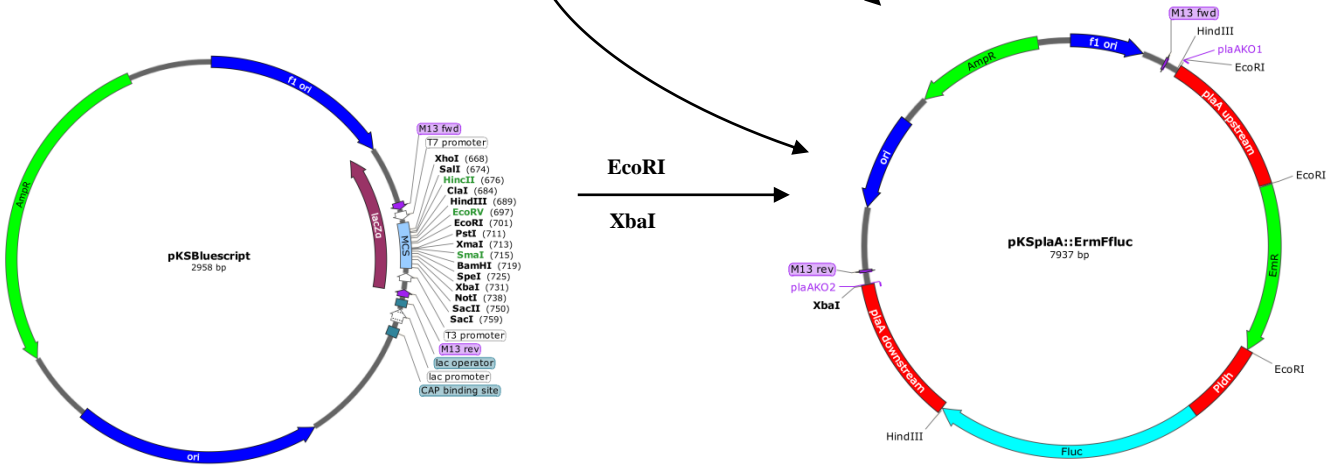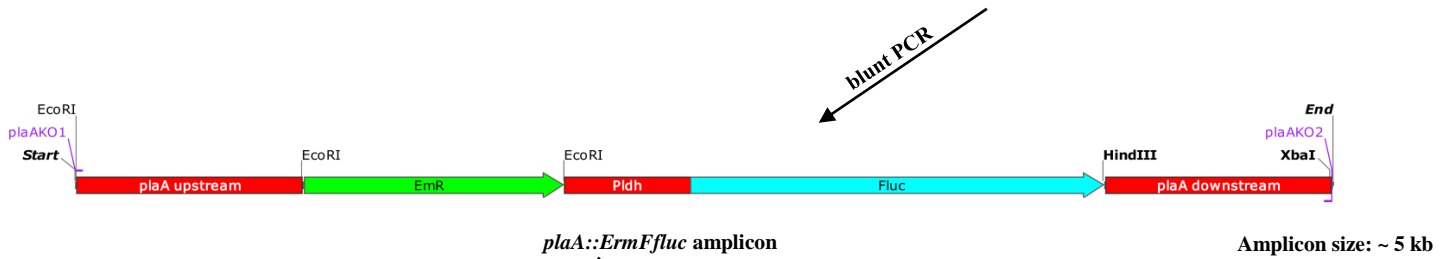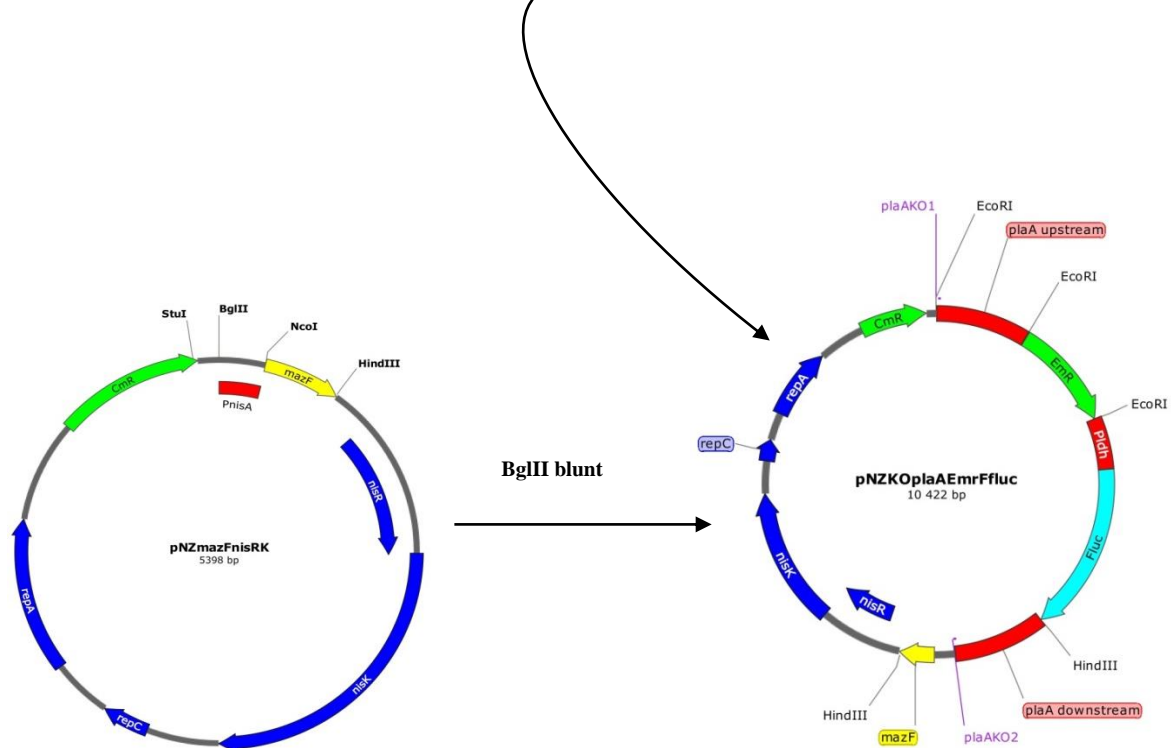

**Additional file 1: Fig. S4.** Schematic representing the construction of the pNZKO $\phi$ A::ErmFfluc integrative plasmid containing the *erm* gene and two flanking sequences of the *plaA* bacteriocin gene from *L. plantarum* 423. Relevant genes, restriction sites and PCR primers are shown. Construction of the plasmid is best understood by referring to the Additional file 1 Text S1.

(a)

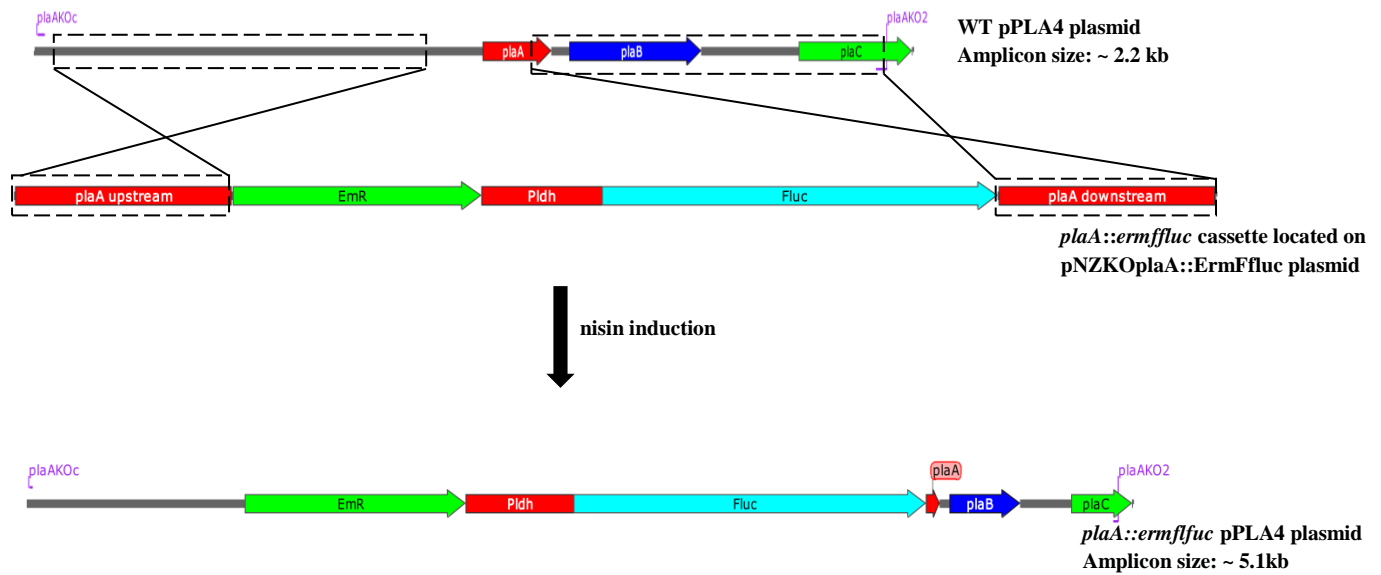

(b)

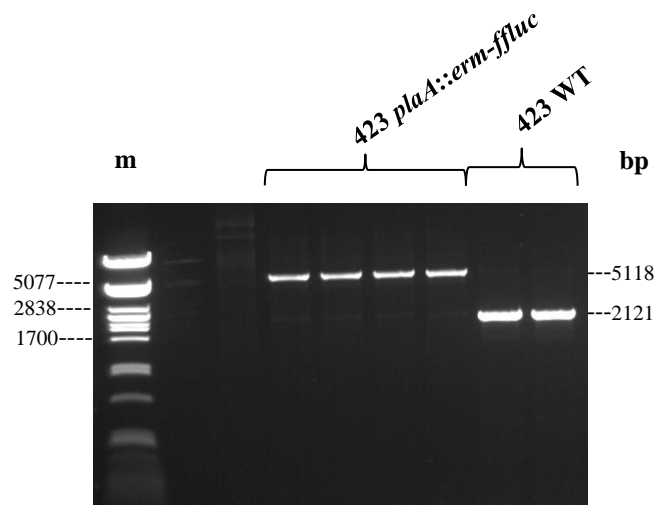

**Additional file 1: Fig. S5.** Gene deletion and integration via homologous recombination into the genome of *L. plantarum* 423 at the *plaA* bacteriocin gene locus to create *L. plantarum* 423 *plaA::erm-ffluc*. (a) Homologous recombination between the wild-type (WT) pPLA4 plasmid and the *plaA::ermffluc* cassette. Boxed regions show the upstream and downstream regions of homology (~ 0.9 kb) on plasmid pPLA4 and the pNZKO*plaA::ErmFfluc* KO vector. Cells harboring the *plaA* KO vector were selected on Cm and Em, followed by nisin induction for MazF toxin expression to select for mutants that have lost the plasmid backbone bearing *cat* and *mazF* genes. Double crossover mutants were selected and screened by PCR using the primer combinations indicated in purple. (b) PCR amplification of WT and *plaA* deletion and insertion mutants using the primer pair indicated in panel A. (m) Lambda DNA digested with PstI (NEB). Amplicons from four *plaA* mutant and two WT colonies, respectively, are shown.



Time required (days)

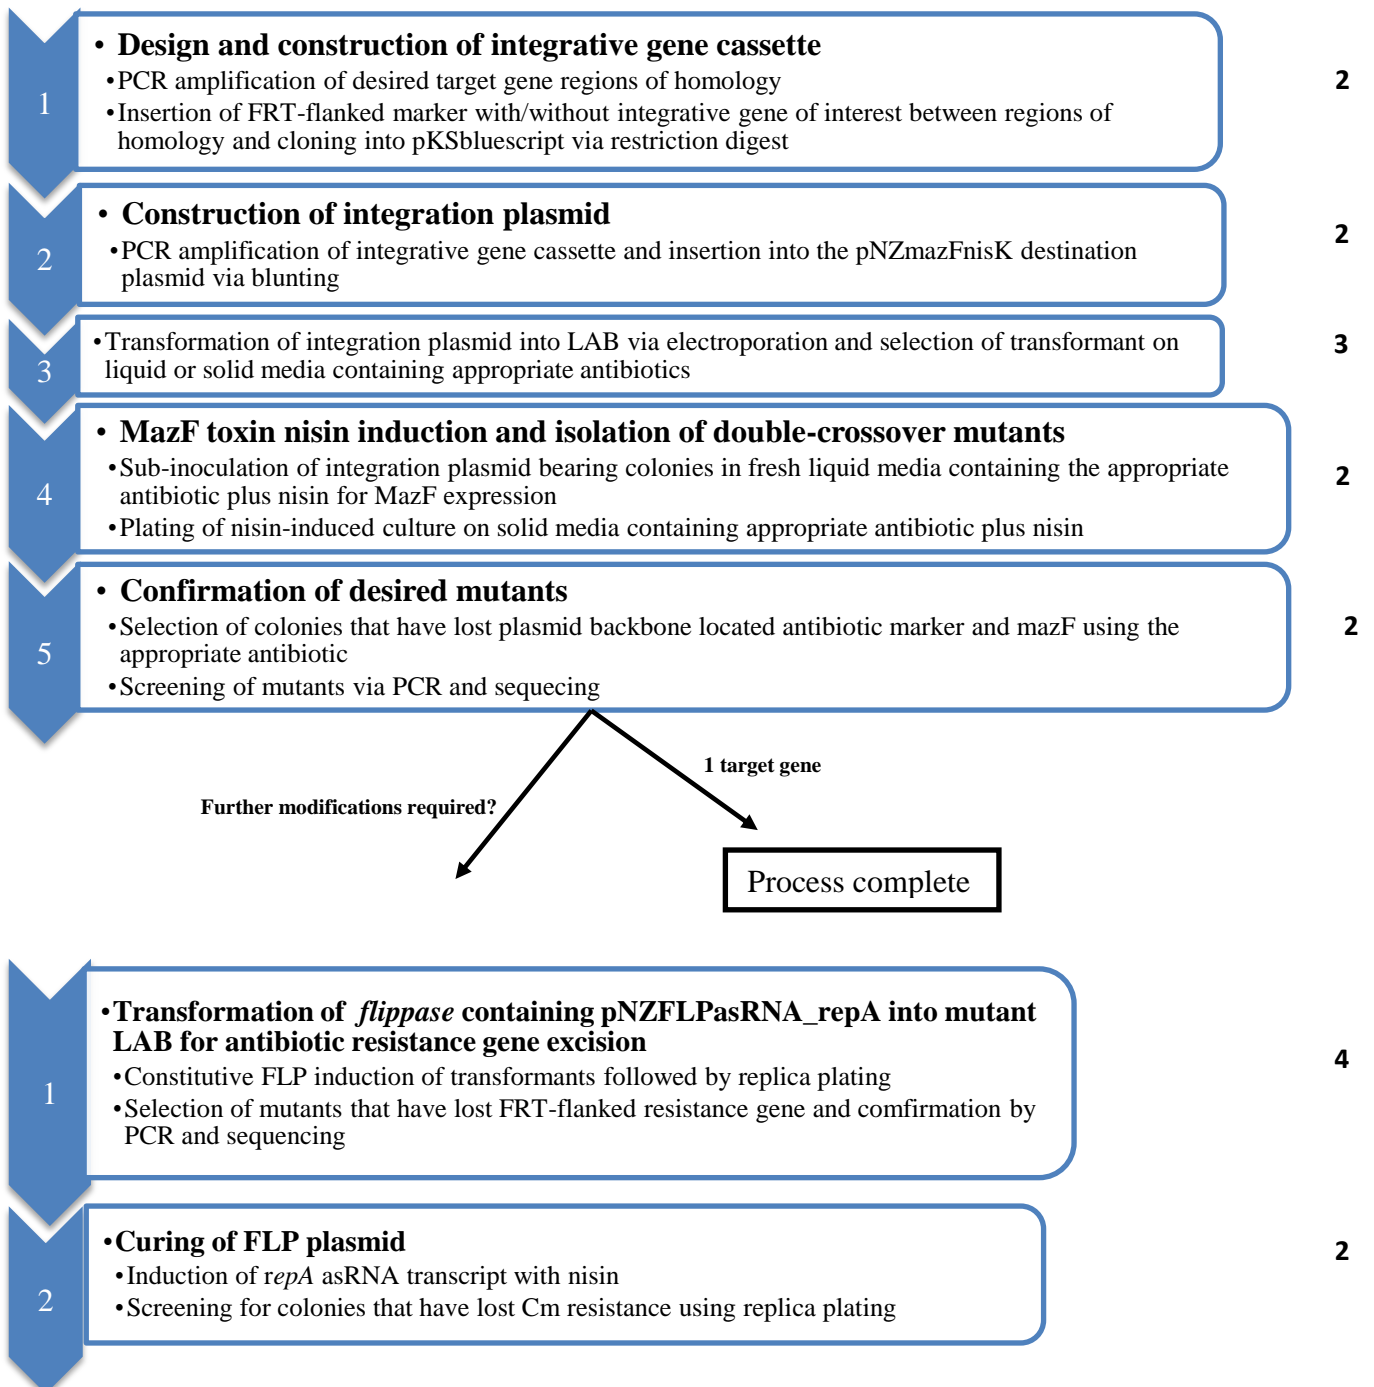

**Additional file 1: Fig. S6.** A workflow diagram showing the step-by-step design and protocol of the newly developed counterselection method for the deletion and inactivation of LAB genes or to introduce genes of interest followed by resistance marker recycling.

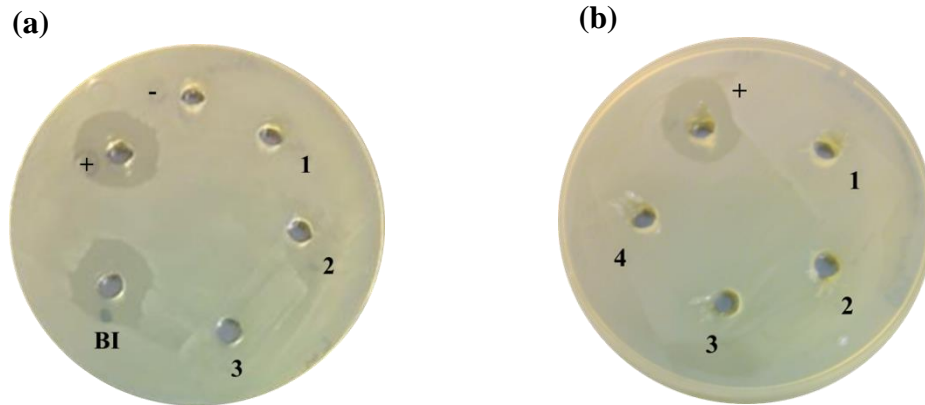

**Additional file 1: Fig. S7.** Zones of inhibition on plates overlaid with *L. monocytogenes* EGDe.

**a.** (BI) Supernatant containing bacteriocin plantaricin 423 isolated from *L. plantarum* 423 transformed with KO plasmid pNZKOplaA::ErmFfluc before induction with nisin, (+) supernatant containing bacteriocin plantaricin 423 isolated from wild-type (WT) *L. plantarum* 423 as positive control, (-) supernatant lacking plantaricin 423 bacteriocin isolated from *L. plantarum* 423 bac- as negative control and supernatants (1, 2 & 3) lacking bacteriocin plantaricin 423 isolated from three *L. plantarum* 423 *plaA::erm-ffluc plaA* gene deletion mutants. **b.** (+) Supernatant containing bacteriocin mundticin ST4SA isolated from WT *E. mundtii* ST4SA as positive control and supernatants (1, 2, 3 & 4) lacking bacteriocin mundticin ST4SA isolated from four *E. mundtii* ST4SA *munA::cat-ffluc munA* gene deletion mutants.

(a)

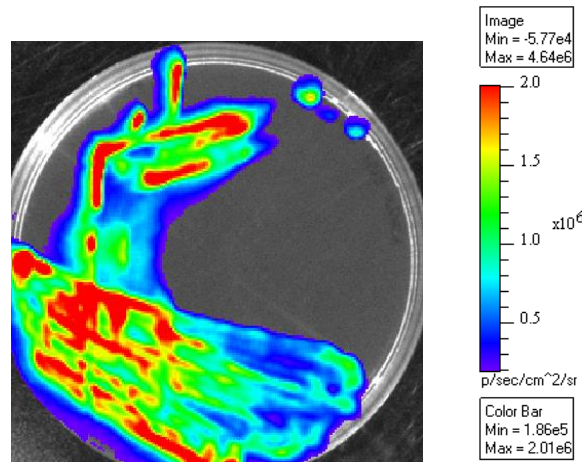

(b)

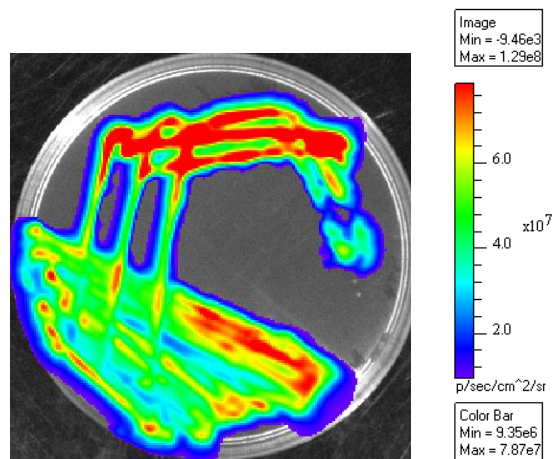

**Additional file 1: Fig. S8.** MRS agar plates showing bioluminescence emission of *ffluc* luciferase gene integration mutants. (a) Bioluminescent *L. plantarum* 423 *plaA::erm-ffluc* double-crossover mutant colonies harboring the *ffluc* gene integrated at the *plaA* locus. (b) Bioluminescent *E. mundtii* ST4SA *munA::cat-ffluc* double-crossover mutant colonies harboring the *ffluc* gene integrated at the *munA* locus. Images were generated using the Living Image® software program and representative scale bars (in photons per second) are indicated for each image (red, most intense and purple being the least intense).



**Additional file 1: Fig. S9.** Schematic representing the construction of the pNZKOsrtA::FRTerm integrative plasmid containing the *erm* gene and two flanking sequences of the *srtA* cell wall adhesion associated gene from *E. mundtii* ST4SA. Relevant genes, restriction sites and PCR primers are shown. Construction of the plasmid is best understood by referring to “Materials and Methods” in the main text.



**Additional file 1: Fig. S10.** Schematic representing the construction of the pNZKO<sub>srtC::FRTerm</sub> integrative plasmid containing the *erm* gene and two flanking sequences of the *srtC* cell pilus associated gene from *E. mundtii* ST4SA. Relevant genes, restriction sites and PCR primers are shown. Construction of the plasmid is best understood by referring to the Additional file 1 Text S1.

(a)

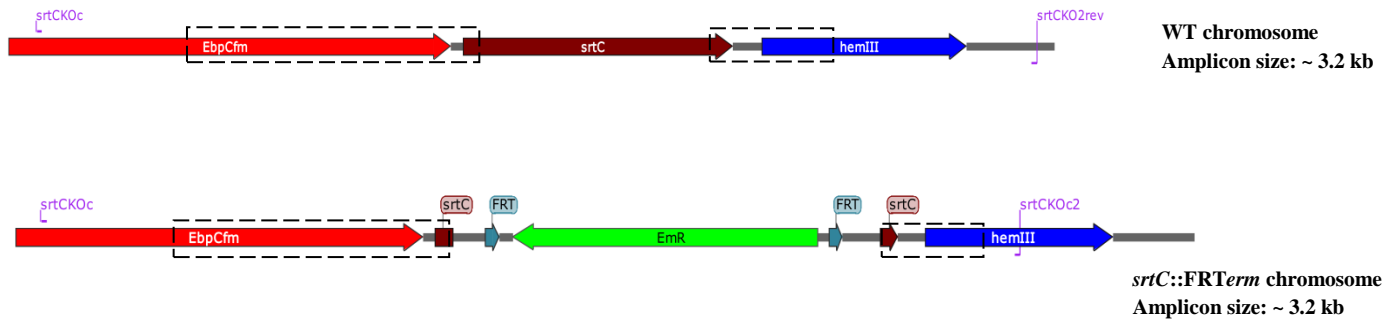

(b)

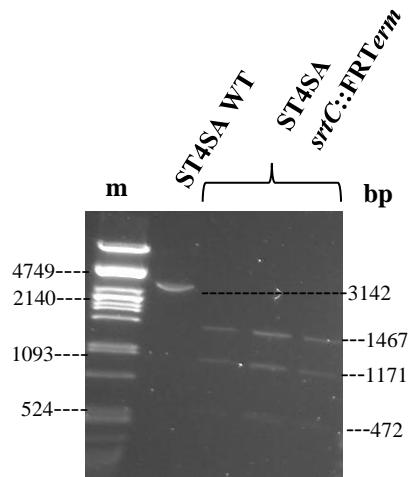

**Additional file 1: Fig. S11.** Gene deletion and integration via homologous recombination into the genome of *E. mundtii* ST4SA at the *srtC* locus to create *E. mundtii* ST4SA *srtC::FRTerm*. **(a)** Schematic representing the wild-type (WT) *E. mundtii* ST4SA *srtC* gene locus and the recombinant *srtC* deletion and FRT-*erm* integration site. Boxed regions show the upstream (~ 1 kb) and downstream (~ 0.4 kb) regions of homology on the WT chromosome and the recombinant *srtC::FRTerm* locus. Cells harboring the *srtC* KO vector were selected on Cm and Em, followed by nisin induction for MazF toxin expression to select for mutants that have lost the plasmid backbone bearing *cat* and *mazF* genes. Double crossover mutants were selected and screened by PCR using the indicated primer combinations. **(b)** PCR amplification of WT (3142 bp) and *srtC* deletion and insertion mutants (3183 bp) using the primer pairs indicated in panel B, followed by restriction digestion of the amplicons with *Xba*I. The WT amplicon contained one *Xba*I restriction site, while the *srtC* mutant amplicons contained three *Xba*I restriction sites. **(m)** Lambda DNA digested with *Pst*I (NEB). Digested amplicons from one WT and three *srtC::FRTerm* insertion mutant colonies are shown.



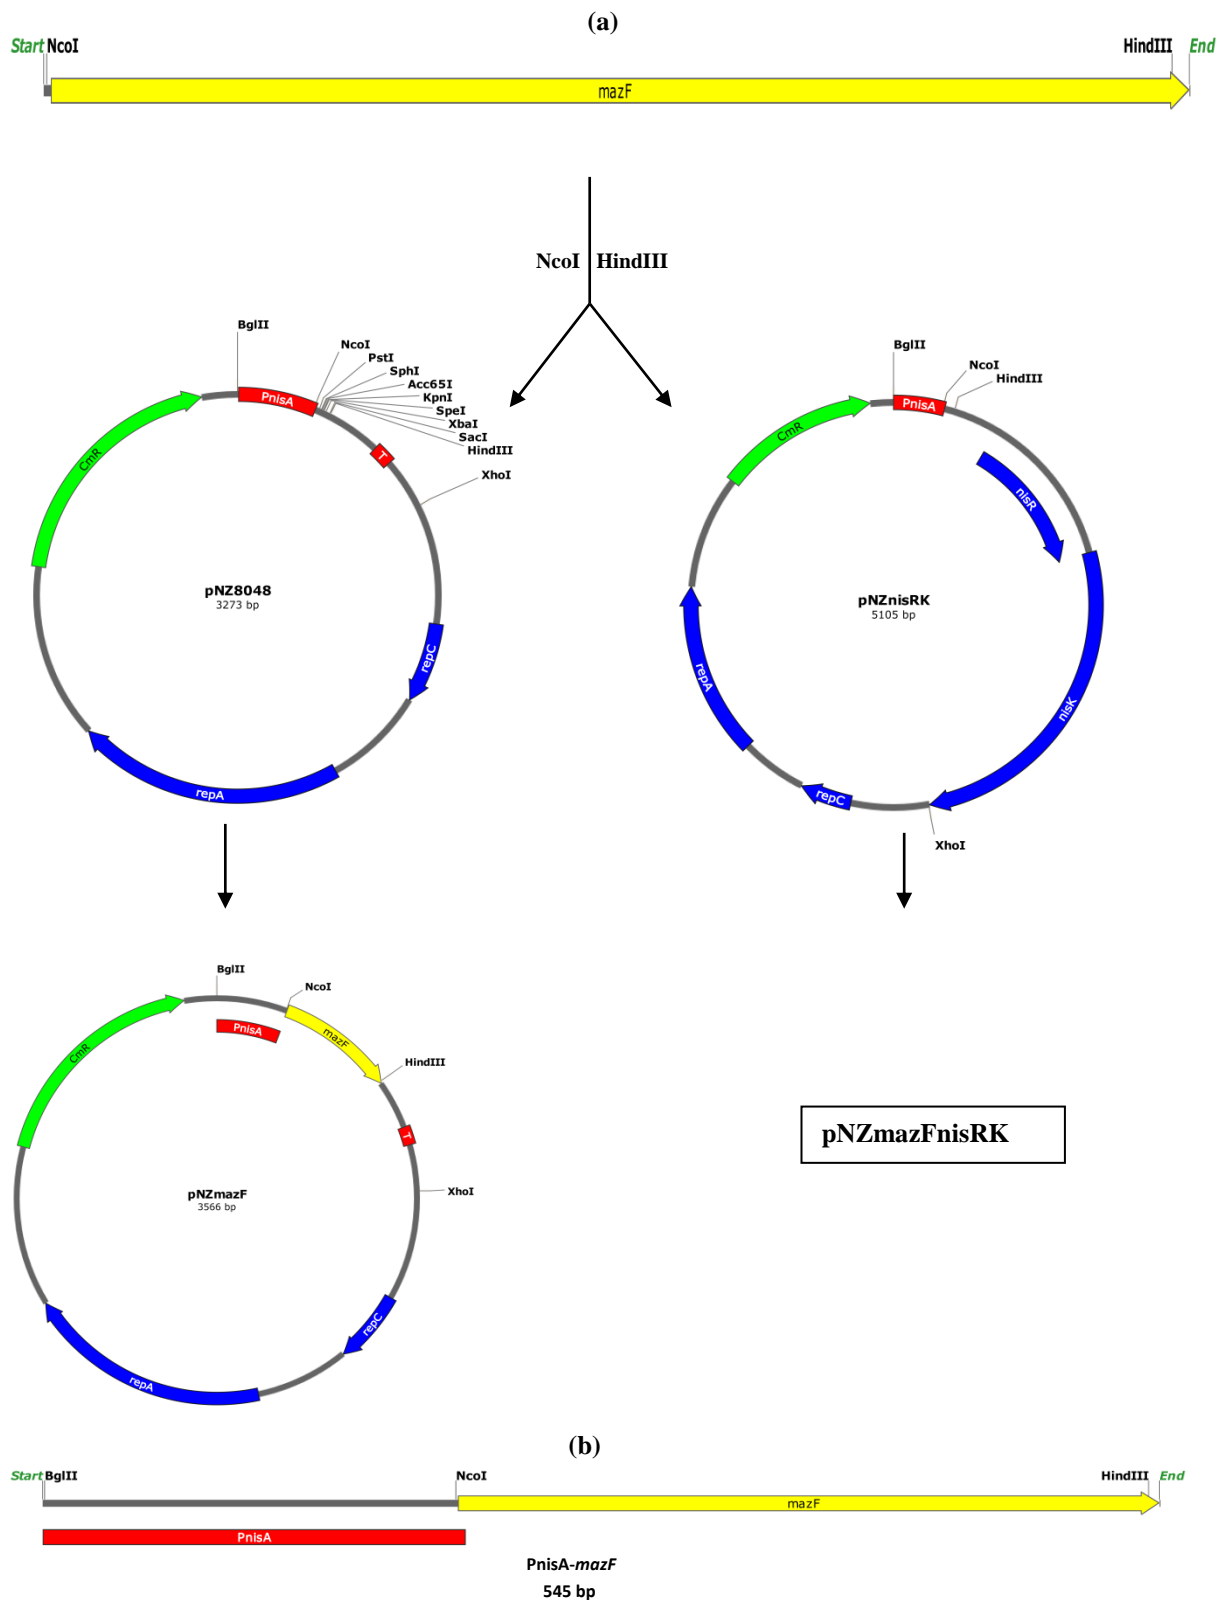

**Additional file 1: Fig. S12. (a)** Schematic representing the construction of the MazF toxin expression plasmids pNZmazF, pNZmazFnisRK and (b) the arrangement of PnisA promoter placed upstream of the *mazF* gene. Relevant restriction sites are shown. Construction of the plasmid is best understood by referring to “Materials and Methods” in the main text.

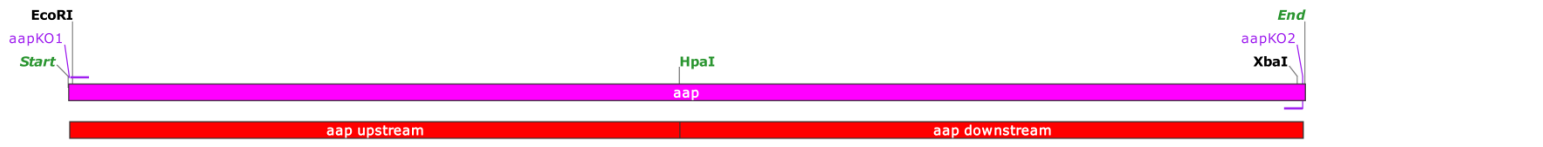

Amplicon size: ~ 1.9 kb

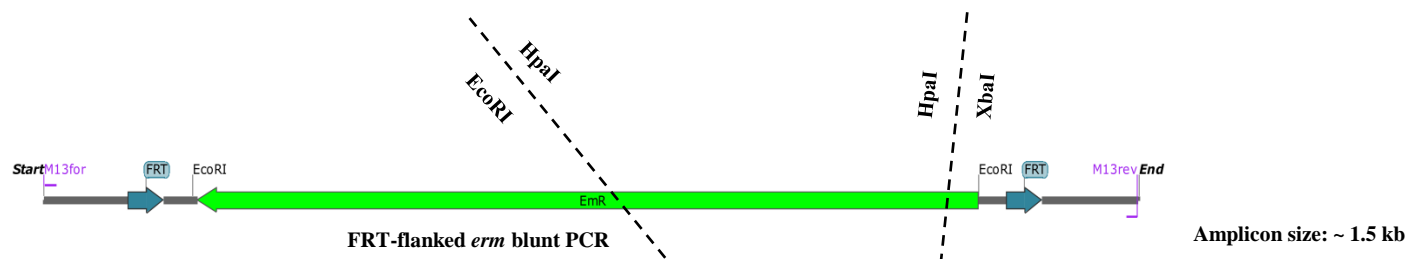

Amplicon size: ~ 1.5 kb

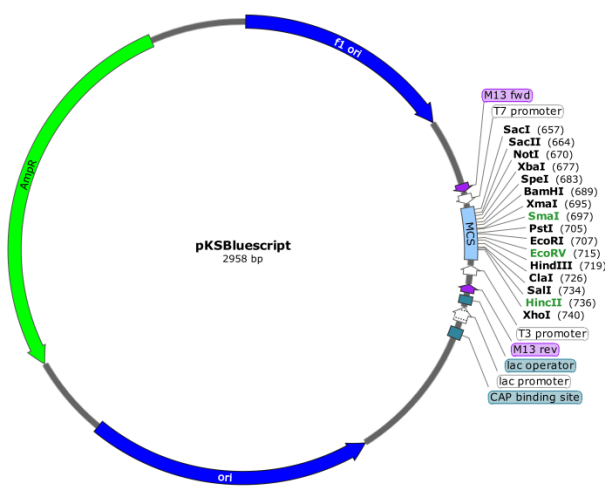

**EcoRI**  
**XbaI**

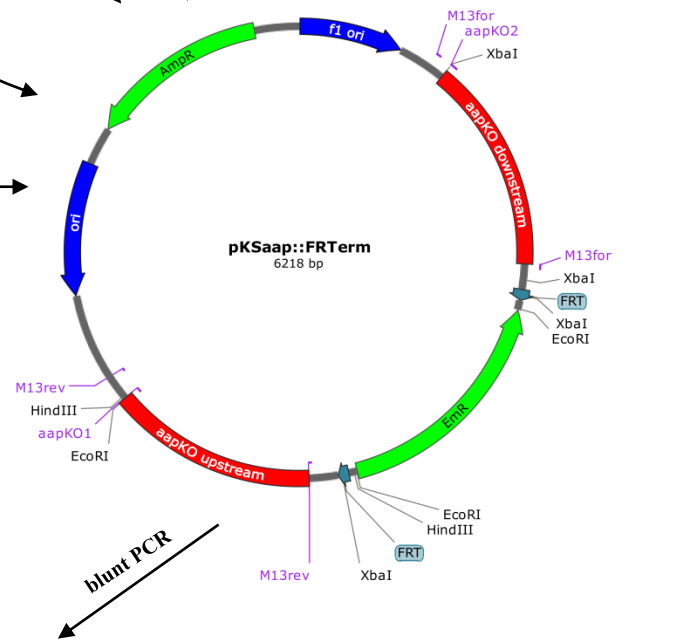

**blunt PCR**

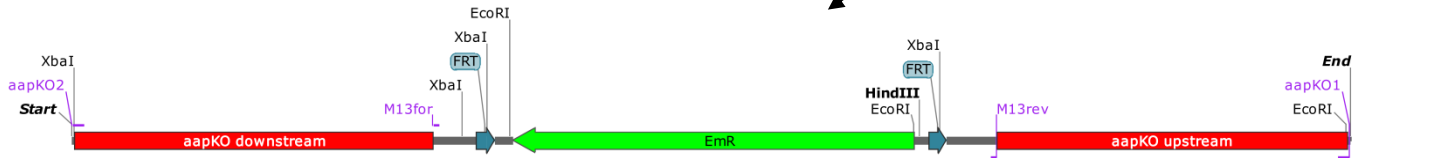

Amplicon size: ~ 3.3 kb

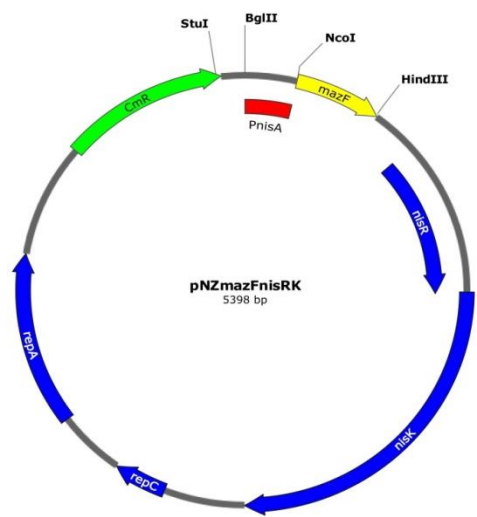

**BglIII, blunt**

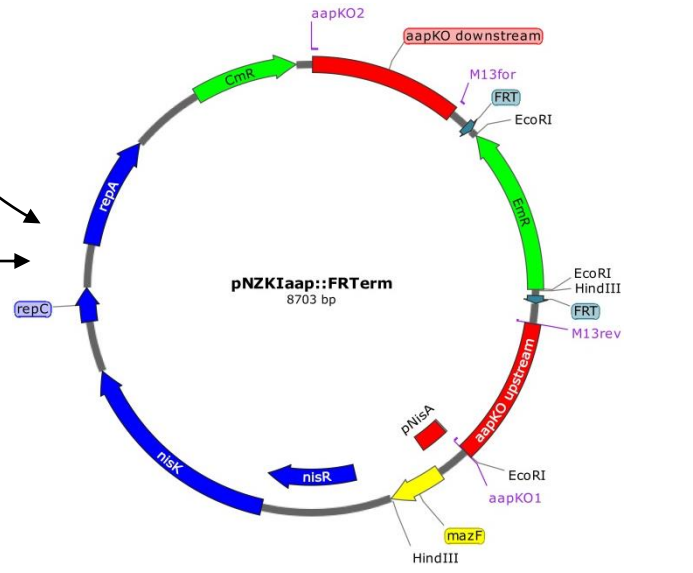

**Additional file 1: Fig. S13.** Schematic representing the construction of the pNZKIaap::FRTerm integrative plasmid containing the *erm* gene and two flanking sequences of the *aap* mucus adhesion gene from *L. plantarum* 423. Relevant genes, restriction sites and PCR primers are shown. Construction of the plasmid is best understood by referring to “Materials and Methods” in the main text.

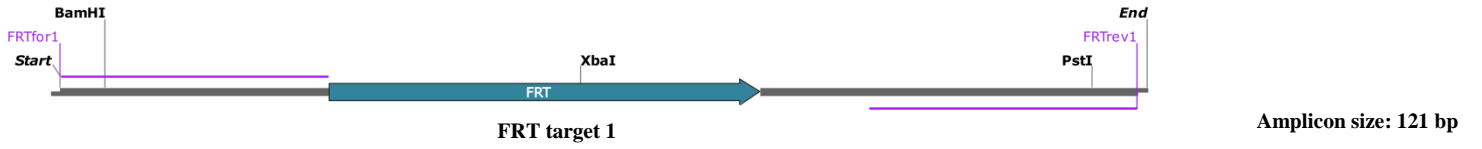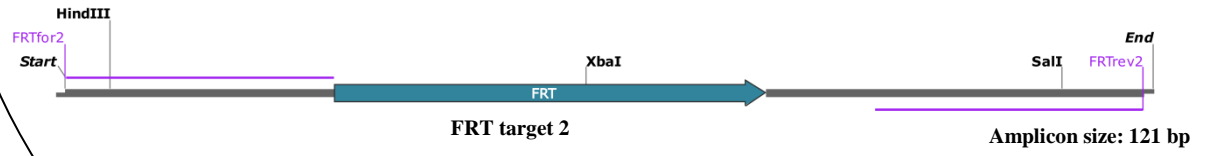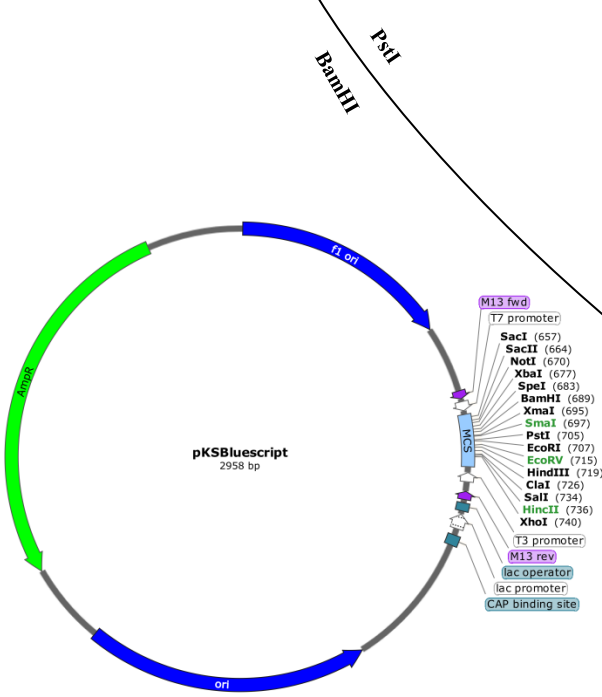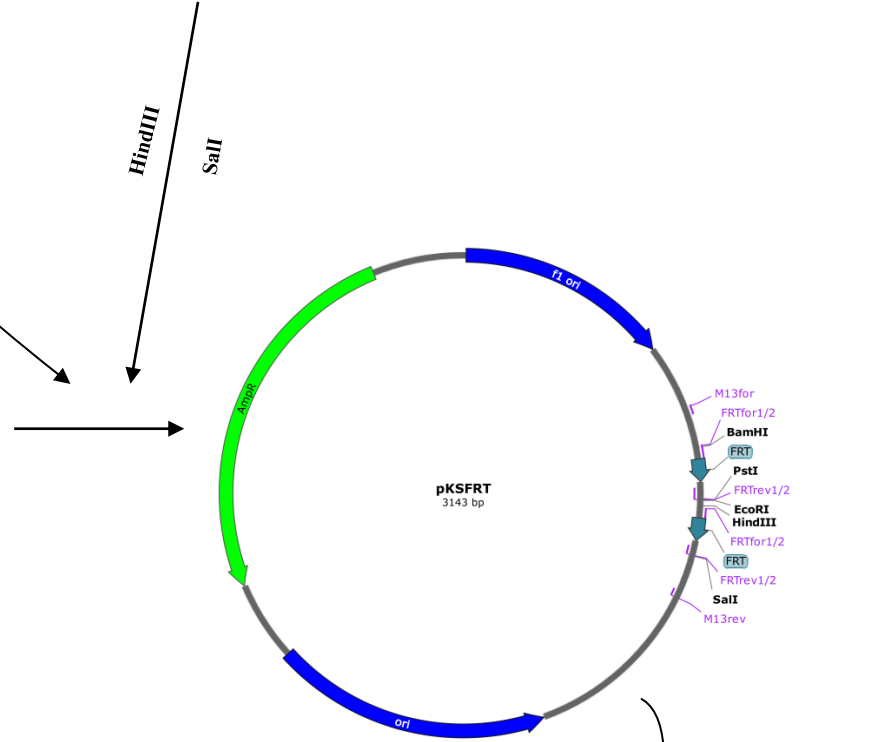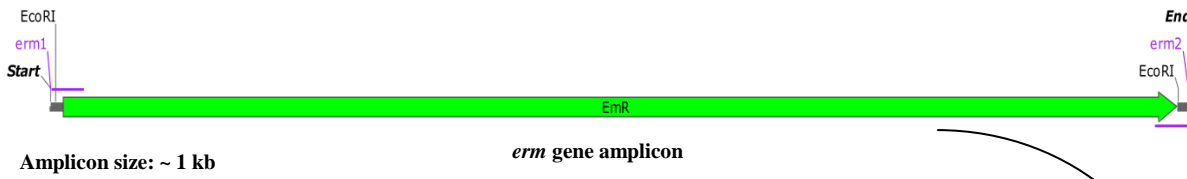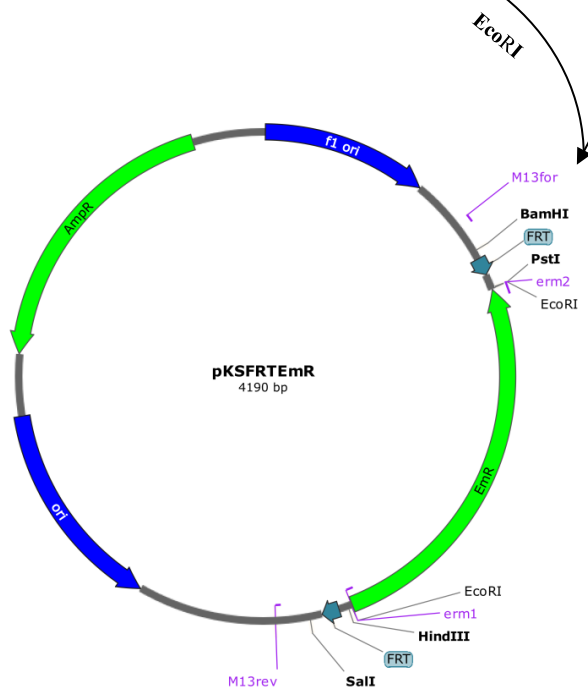

**Additional file 1: Fig. S14.** Schematic representing the construction of plasmid pKSFRTerm containing the FRT-flanked *erm* gene. Relevant genes, restriction sites and PCR primers are shown. Construction of the plasmid is best understood by referring to “Materials and Methods” in the main text.

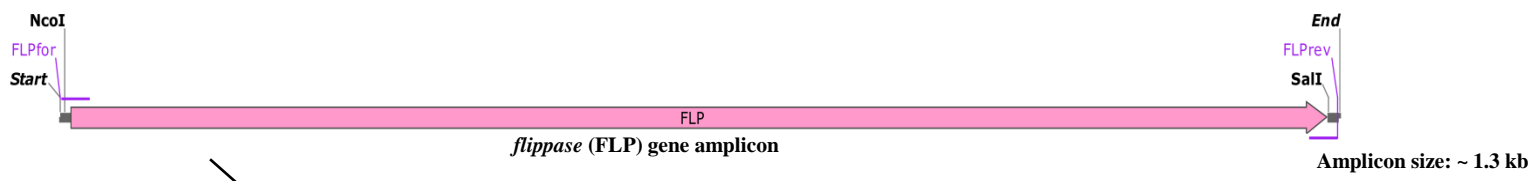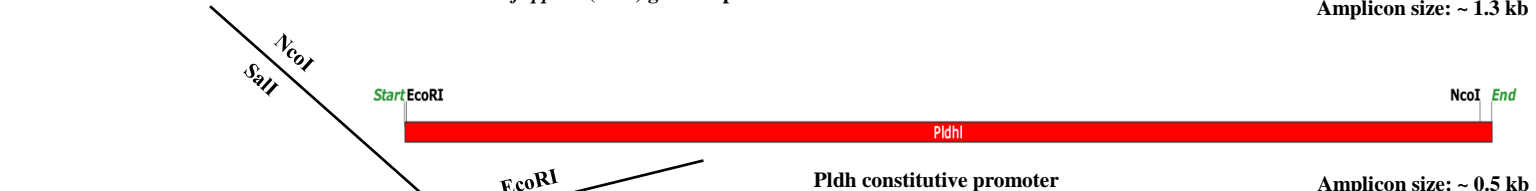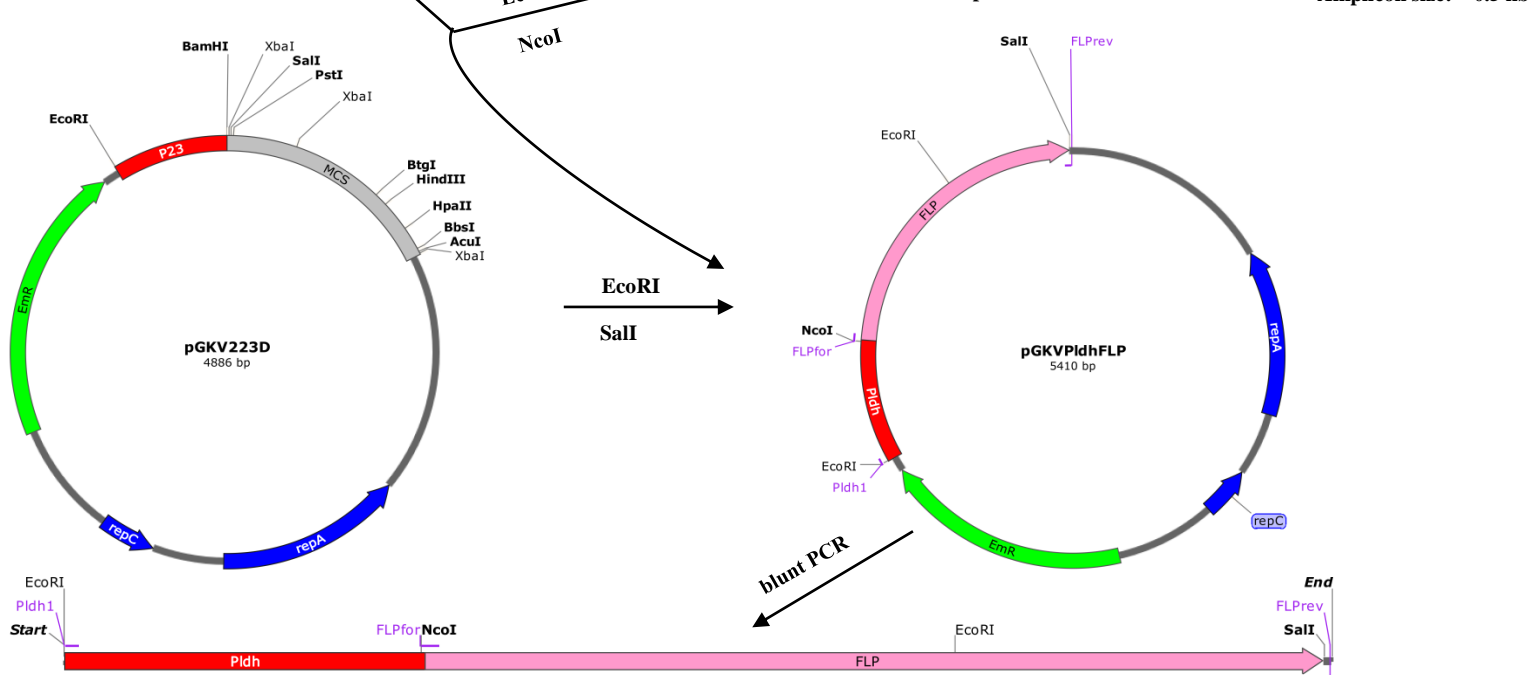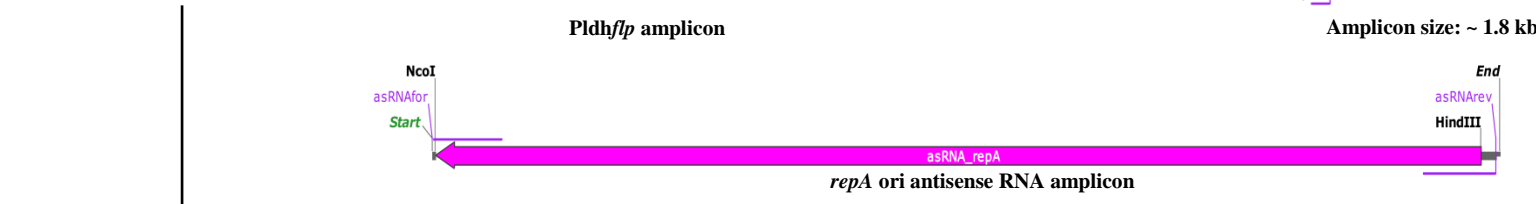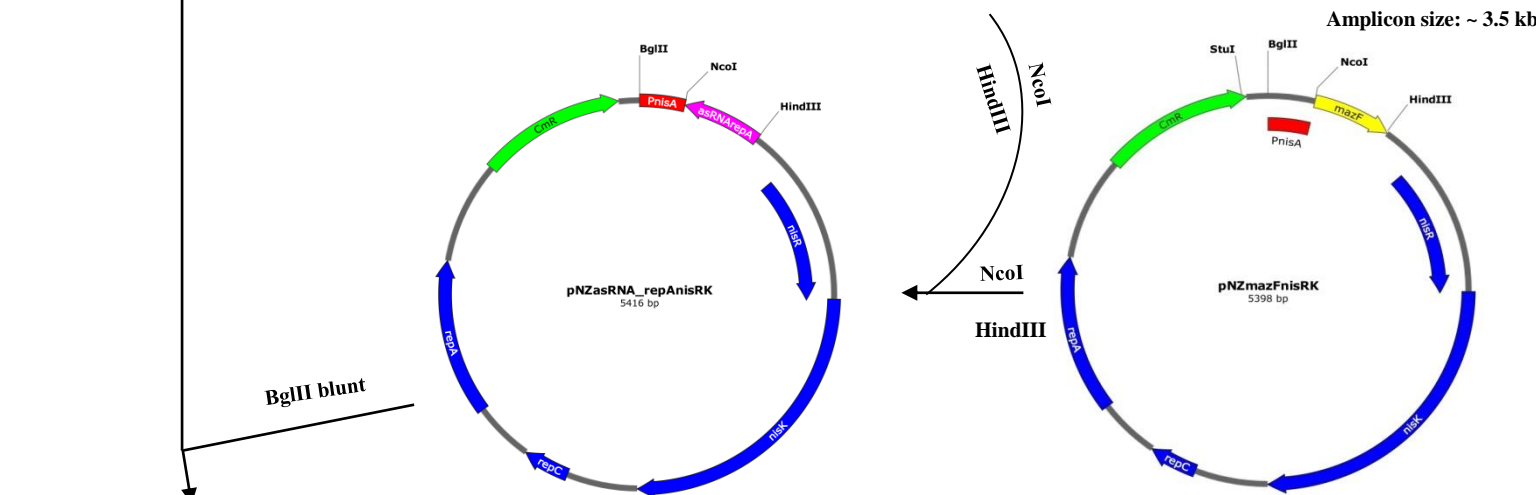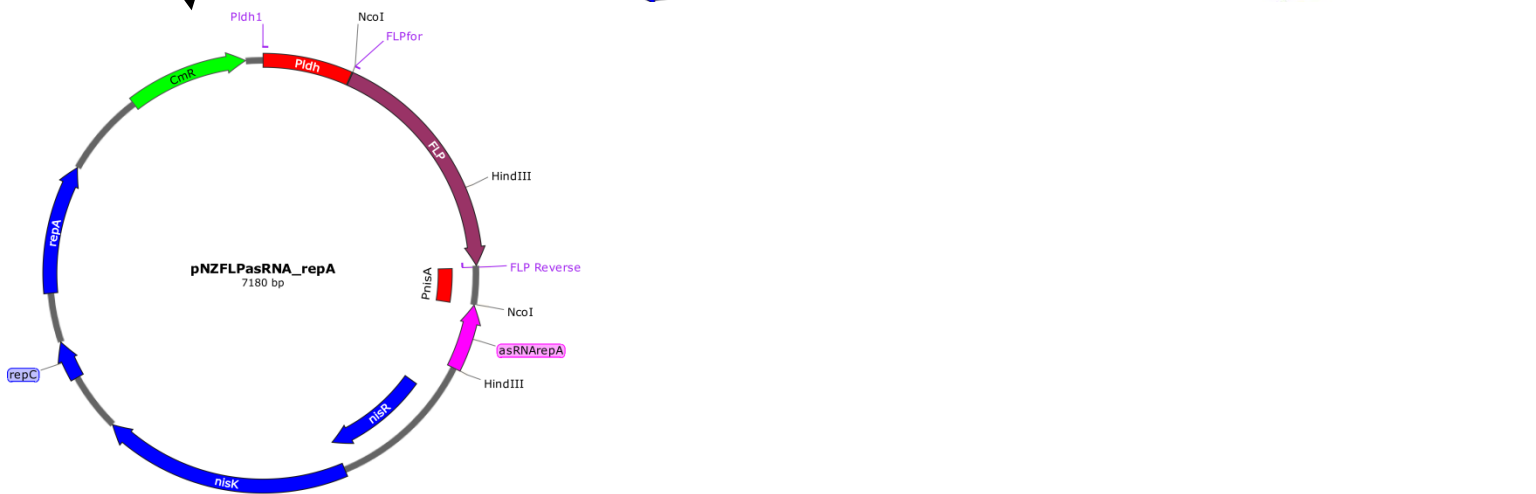

**Additional file 1: Fig. S15.** Schematic representing the construction of plasmid pNZFLPasRNA\_repA containing the *flp* recombinase gene and a *repA* asRNA fragment. Relevant genes, restriction sites and PCR primers are shown. Construction of the plasmid is best understood by referring to “Materials and Methods” in the main text.
